# Supplementary material for: Evaluation of SARS-CoV-2 IgG antibody response in PCR positive patients: Comparison of nine tests in relation to clinical data
Source: PubMed Central journal article supplement (PMC7591045; doi:10.1371/journal.pone.0237548), 2020-10-27

**S2 Fig. Correlations between SARS-CoV-2 antibody tests of COVID-19 patients (n=97): quantitative results plots.**

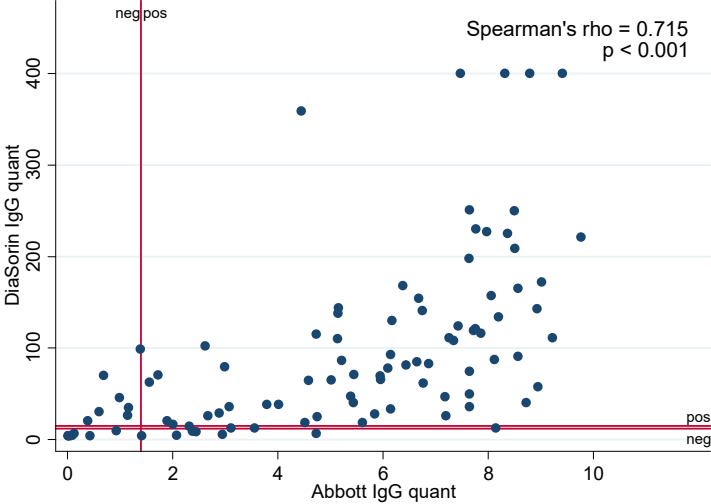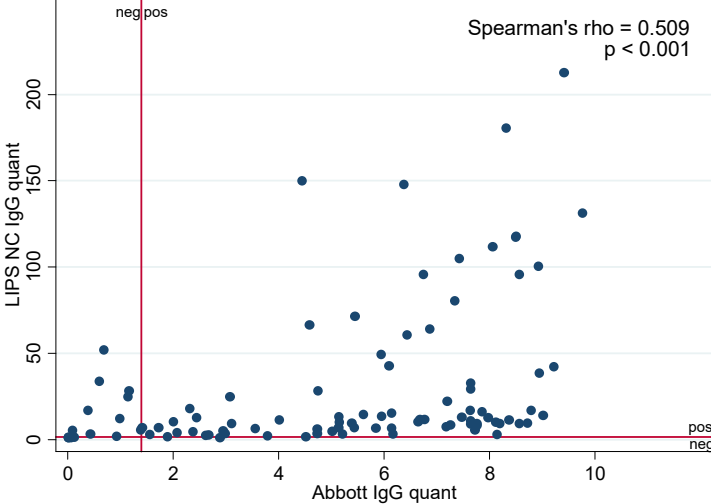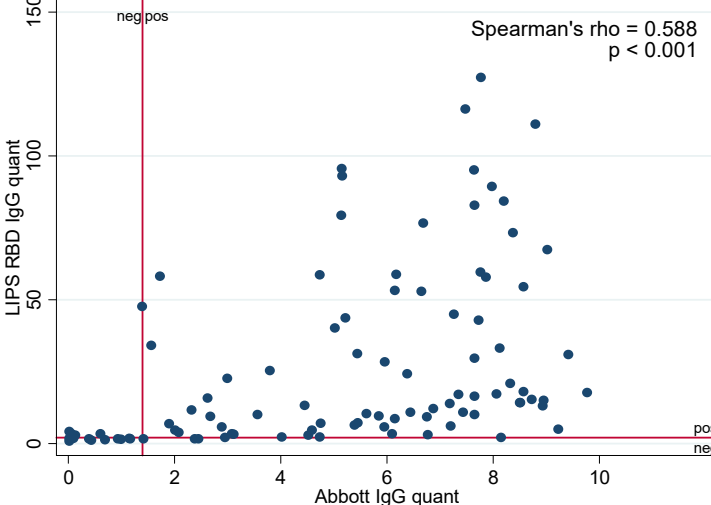

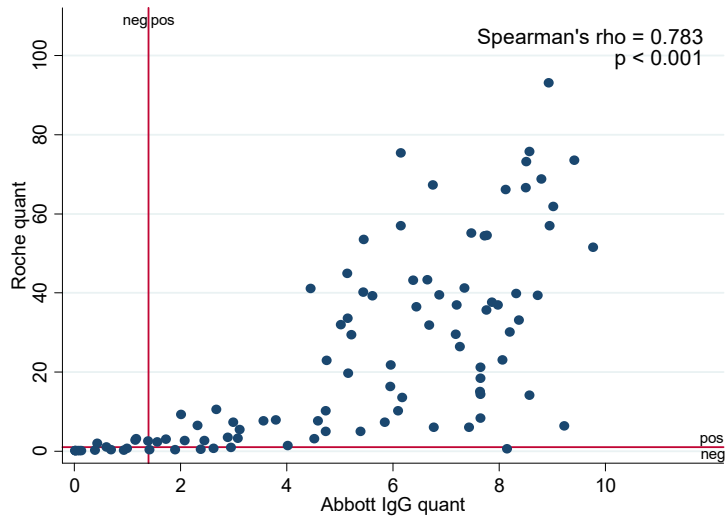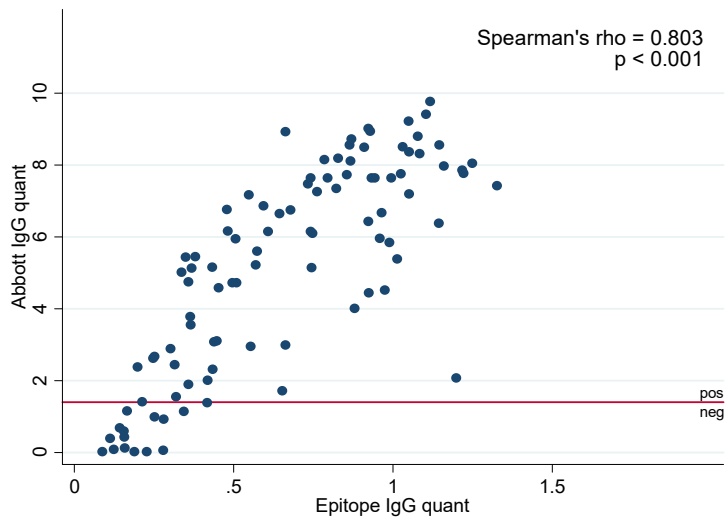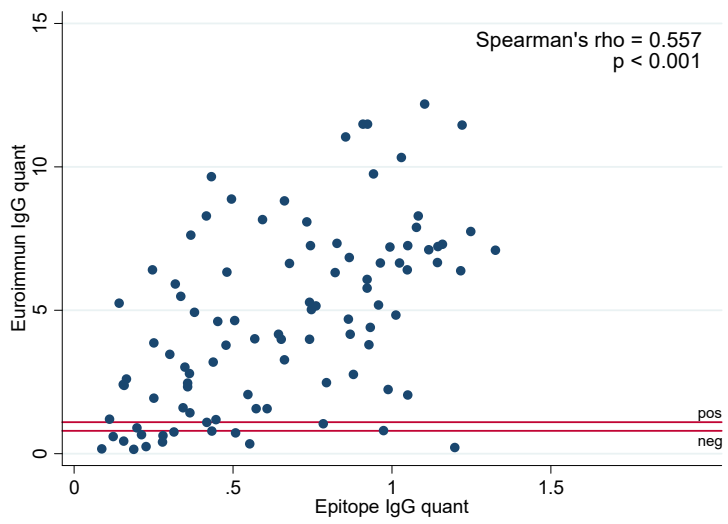

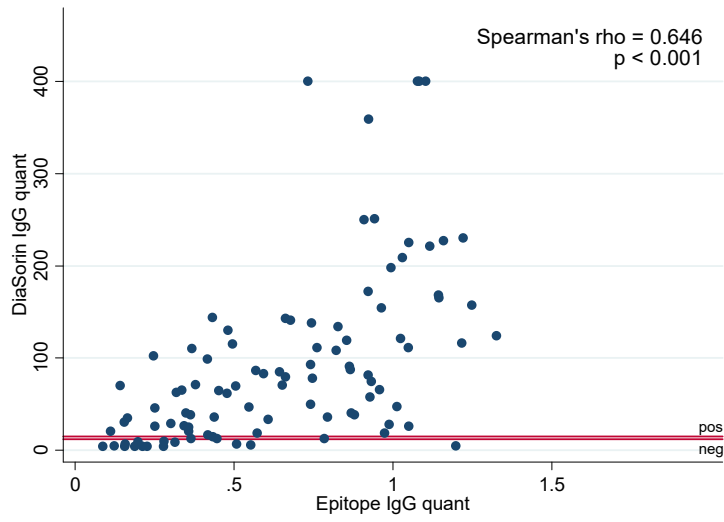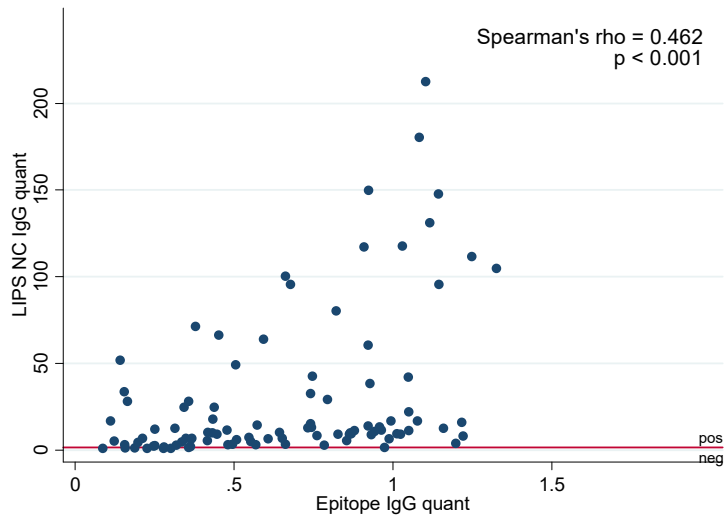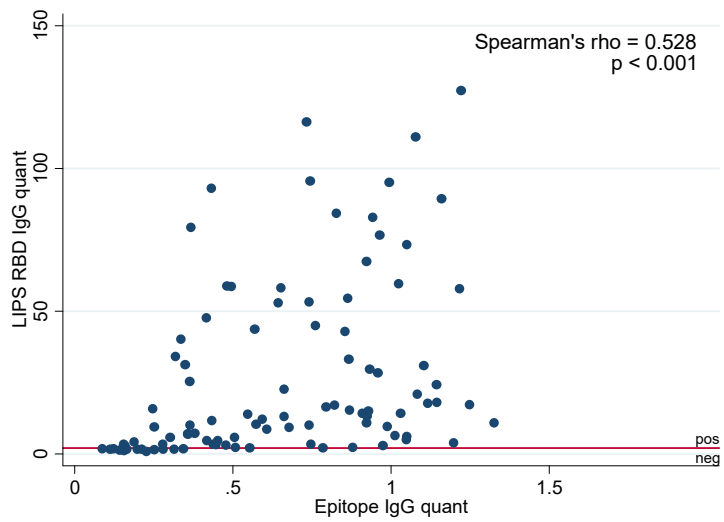

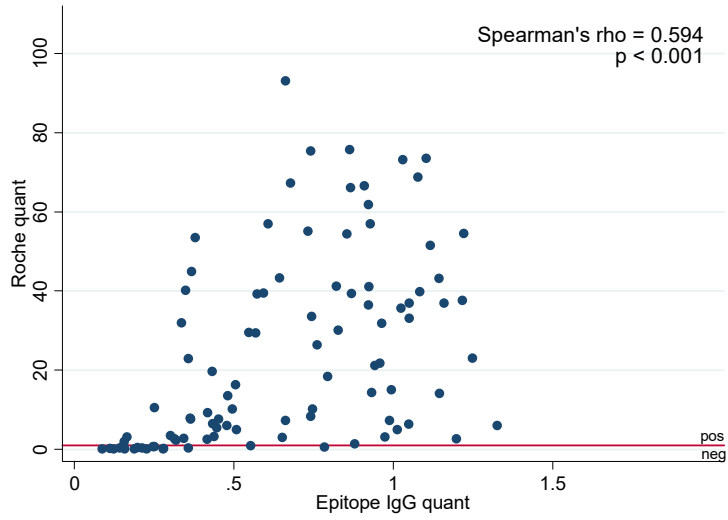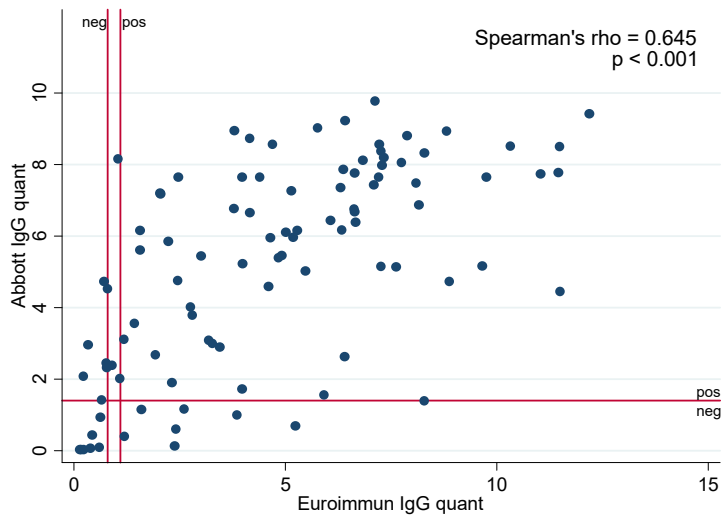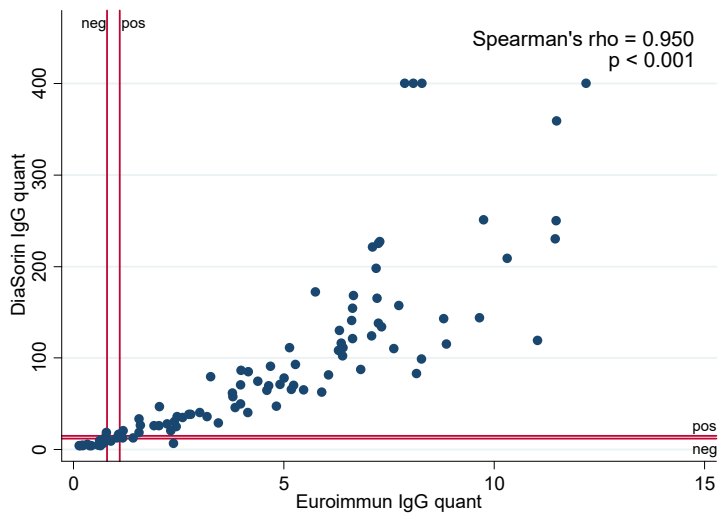

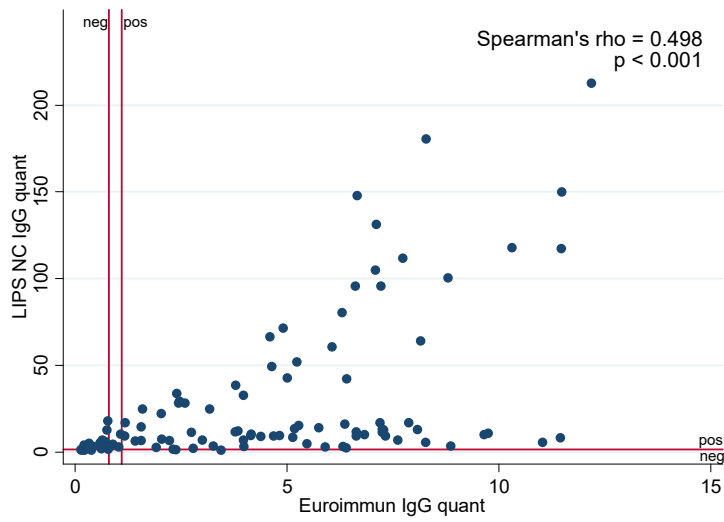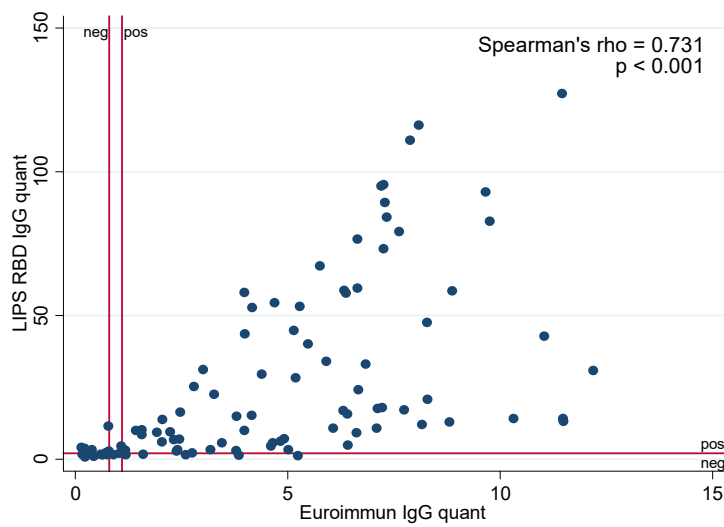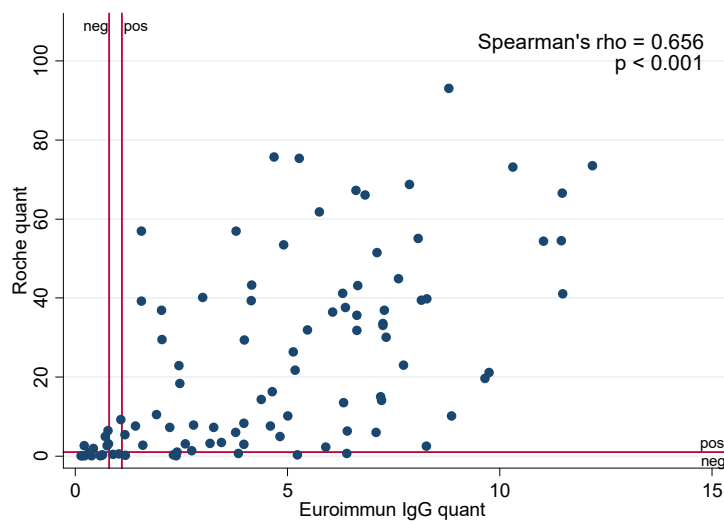

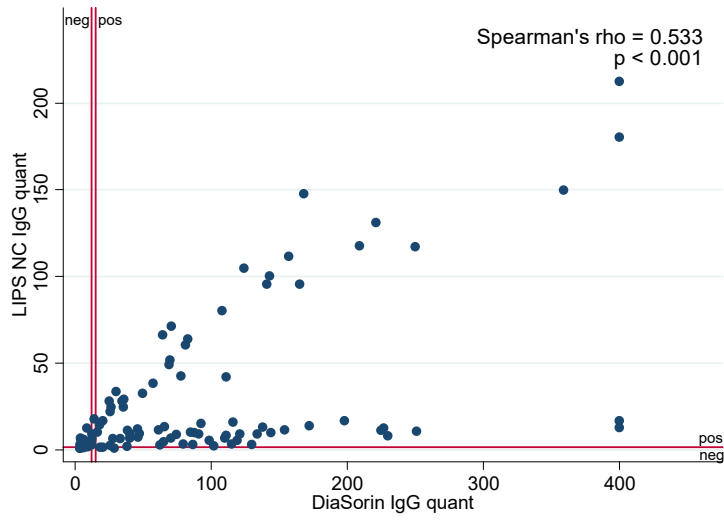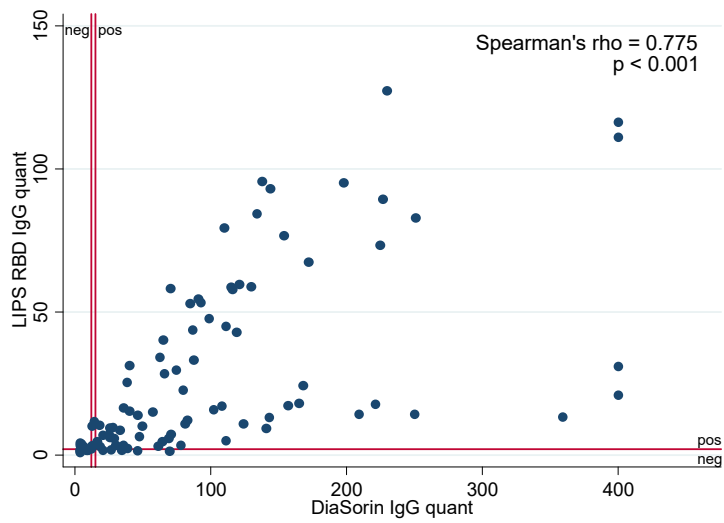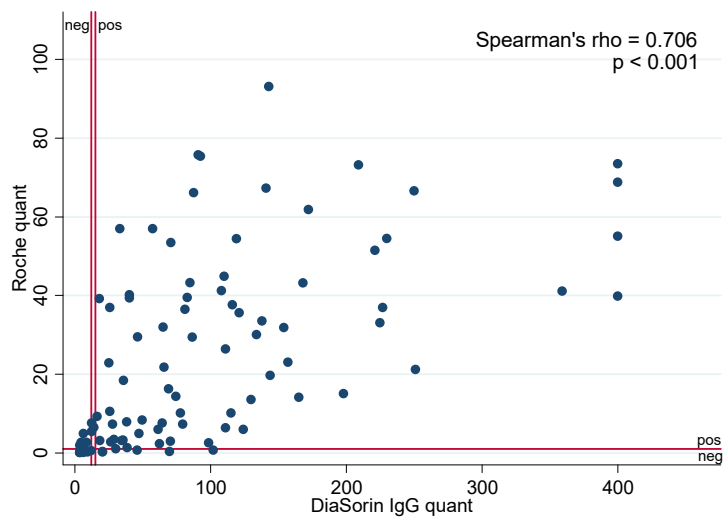

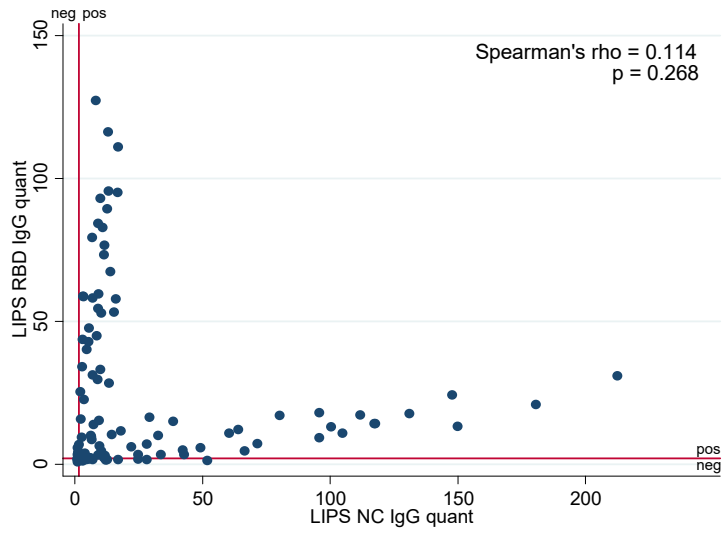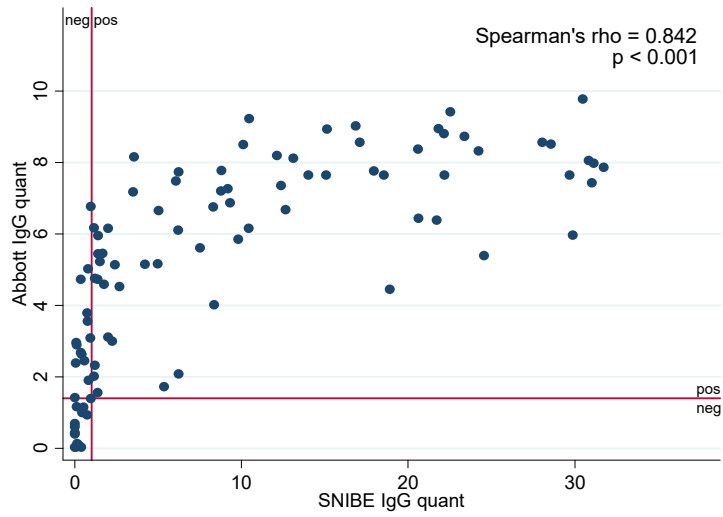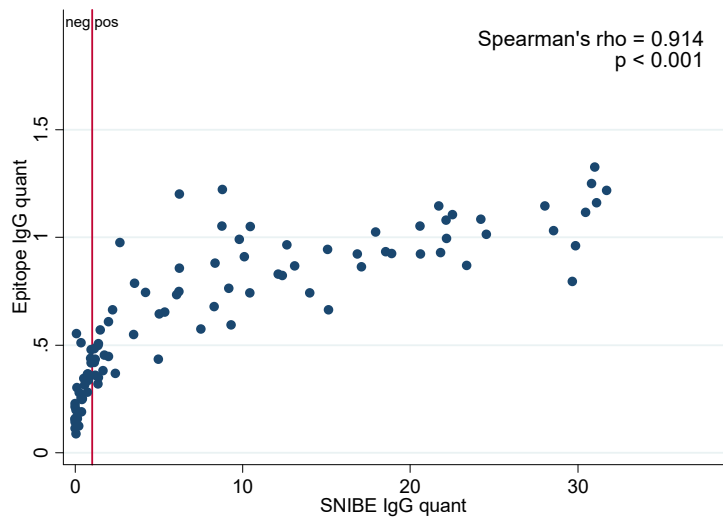

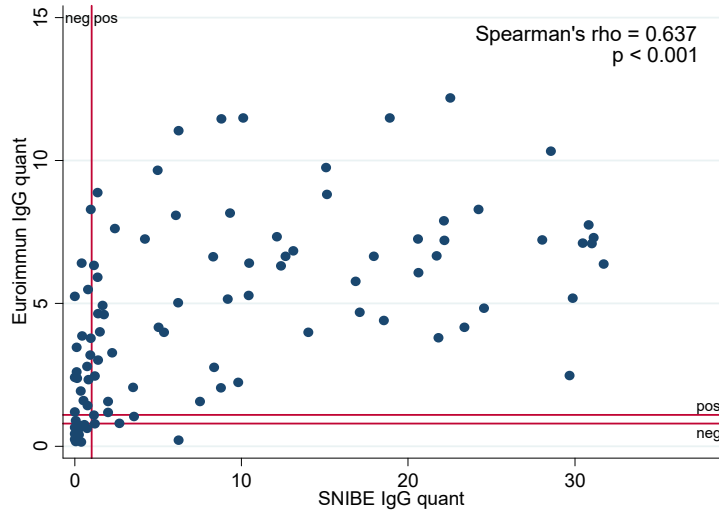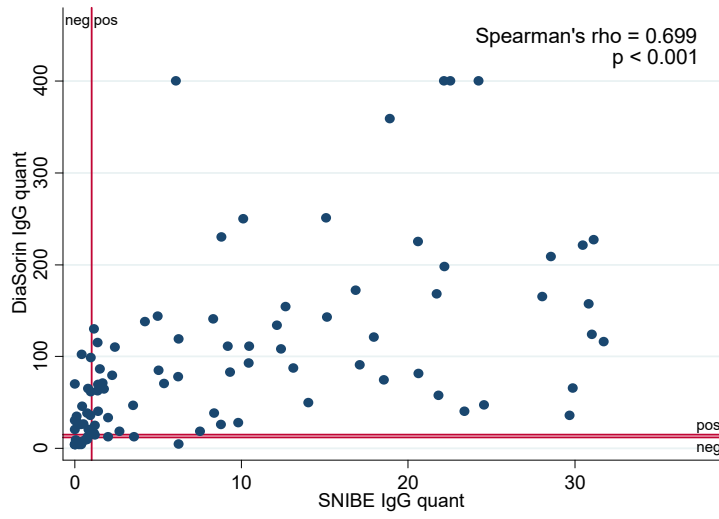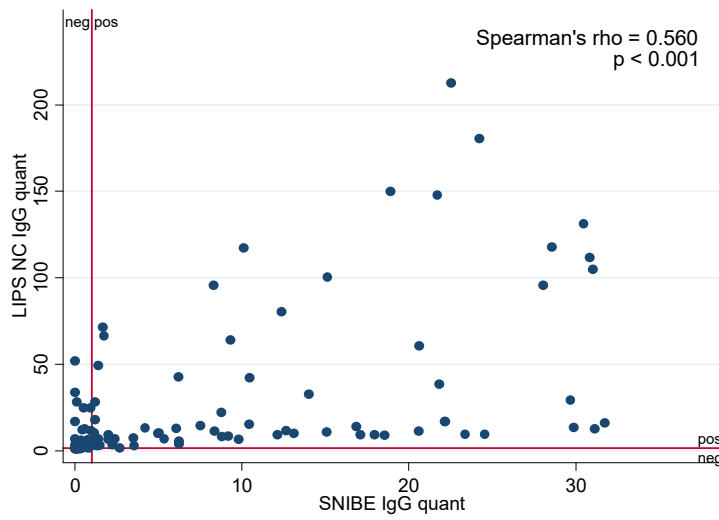



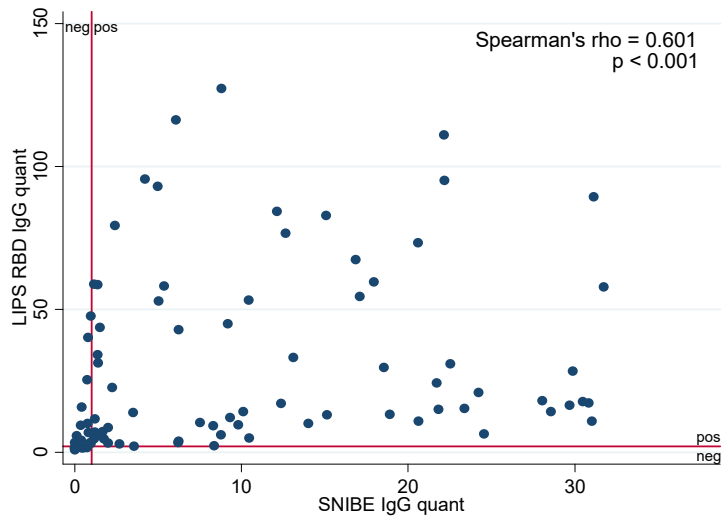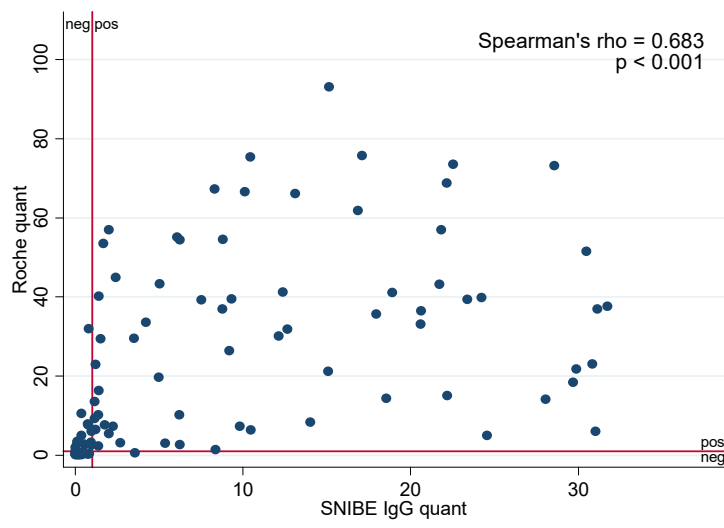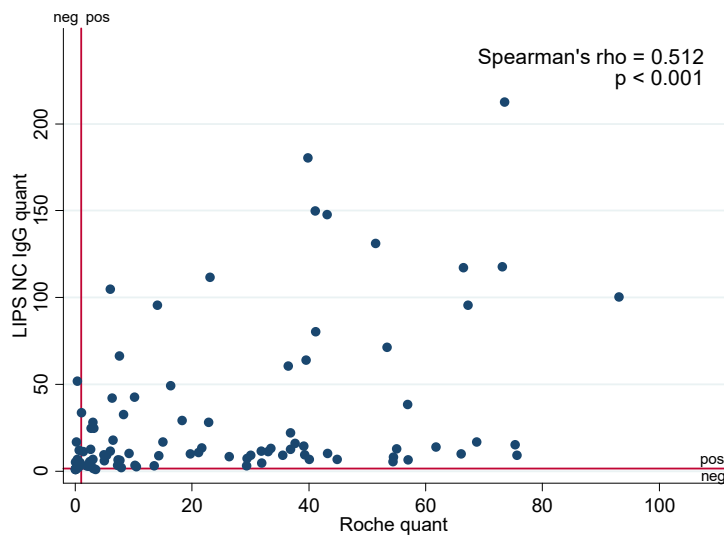

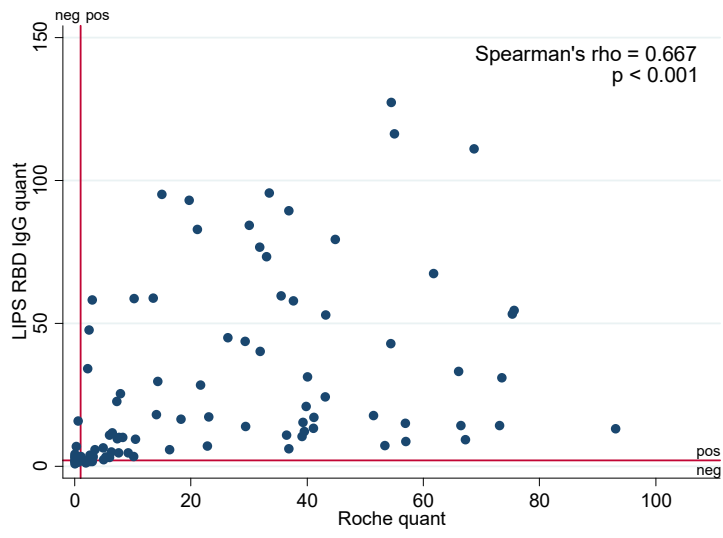

Supplement: pone.0237548.s003.pdf [file pone.0237548.s003.pdf]
