# Supplementary material for: Evaluation of SARS-CoV-2 IgG antibody response in PCR positive patients: Comparison of nine tests in relation to clinical data
Source: PubMed Central journal article supplement (PMC7591045; doi:10.1371/journal.pone.0237548), 2020-10-27
Supplement: pone.0237548.s001.pdf [file pone.0237548.s001.pdf]

**S1 Table. Detailed information about applied SARS-CoV-2 antibody tests**

| <b>Test, manufacturer</b>                                                                | <b>Analyzer</b>                         | <b>Method</b>                                       | <b>Protein marker reported by producer</b>   | <b>Interpretation criteria</b>                                 |
|------------------------------------------------------------------------------------------|-----------------------------------------|-----------------------------------------------------|----------------------------------------------|----------------------------------------------------------------|
| MAGLUMI 2019-nCoV IgG, <b>SNIBE*</b> (Shenzhen New Industries Biomedical Engineering Co) | MAGLUMI 1000, SNIBE                     | Chemiluminescence immunoassay (CLIA)                | Recombinant antigen, not specified           | <1 neg; >1 pos                                                 |
| SARS-CoV-2 ELISA IgG, <b>EUROIMMUN*</b> AG                                               | AGILITY®, Dynex Technologies            | Enzyme immunoassay (ELISA)                          | Spike1 (S1)                                  | <0.8 neg; ≥0.8 - <1,1 borderline; ≥1,1 pos                     |
| SARS-CoV-2 IgG, <b>Abbott*</b> Laboratories                                              | ARCHITECT i2000SR, Abbott Laboratories  | Chemiluminescent microparticle immunoassay (CMIA)   | Nucleocapsid (N)                             | <1.4 neg; ≥1.4 pos                                             |
| Elecsys® Anti-SARS-CoV-2, <b>Roche*</b> Diagnostics GmbH                                 | Cobas® e411, Roche Diagnostics GmbH     | Electrochemiluminescence immunoassay (ECLIA)        | Nucleocapsid (N)                             | <1 neg; ≥1 pos                                                 |
| EDI™ Novel Coronavirus COVID-19 IgG ELISA, <b>Epitope*</b> Diagnostics Inc               | AGILITY®, Dynex Technologies            | Enzyme immunoassay (ELISA)                          | Nucleocapsid (N) and Spike (S)               | neg 0.9 x (neg control + 0.10); pos 1.1 x (neg control + 0.10) |
| LIAISON® SARS-CoV-2 S1/S2 IgG, <b>DiaSorin*</b> S.p.A.                                   | LIAISON® XL Analyzer, DiaSorin S.p.A.   | Chemiluminescence immunoassay (CLIA)                | Spike1 (S1) and Spike2 (S2)                  | <12 neg; ≥12 - <15 borderline; ≥15 pos                         |
| STANDARDTM Q COVID-19 IgM/IgG Duo Test, SD <b>Biosensor*</b> Inc                         | Manual evaluation                       | Rapid chromatographic immunoassay                   | Nucleocapsid (N)                             | Positive: any line in test window                              |
| <b>LIPS S-RBD*</b> IgG, in-house                                                         | Victor™ X Plate reader, PerkinElmer Inc | Luciferase Immunoprecipitation Systems (LIPS) assay | Receptor binding domain of the spike (S-RBD) | Neg controls average + 3SD (2.1056 in this study)**            |
| <b>LIPS N*</b> IgG, in-house                                                             | Victor™ X Plate Reader, PerkinElmer Inc | Luciferase Immunoprecipitation Systems (LIPS) assay | Nucleocapsid (N)                             | Neg controls average + 3SD (1.6723 in this study)**            |

\* Short names used in text are indicated in bold; \*\*Statistical cut-off, not clinically validated
